# Supplementary material
Source: publisher site journal article supplement (https://www.spandidos-publications.com/1197/downloadSupplementary)

Figure S1. BARX2 expression in GC AGS cells transfected with lentivirus (*LV*) or *LV-BARX2*. (A and B) *BARX2* mRNA expression in the monoclonal transfectants (*i.e.*, AGS-BARX2.3, AGS-BARX2.5 and AGS-BARX2.6) and polyclonal transfectant (AGS-BARX2) as detected using qPCR. (C and D) BARX2 protein expression in the monoclonal transfectants (*i.e.*, AGS-BARX2.3, AGS-BARX2.5 and AGS-BARX2.6) and polyclonal transfectant (AGS-BARX2) as detected using western blot analysis. The empty *LV* transfectant (AGS-LV) was used as a control.  $\beta$ -actin was used as the internal control. \* $P < 0.05$ , \*\* $P < 0.01$  and \*\*\* $P < 0.001$  compared with AGS-LV. BARX2, BarH-like homeobox 2; GC, gastric cancer.

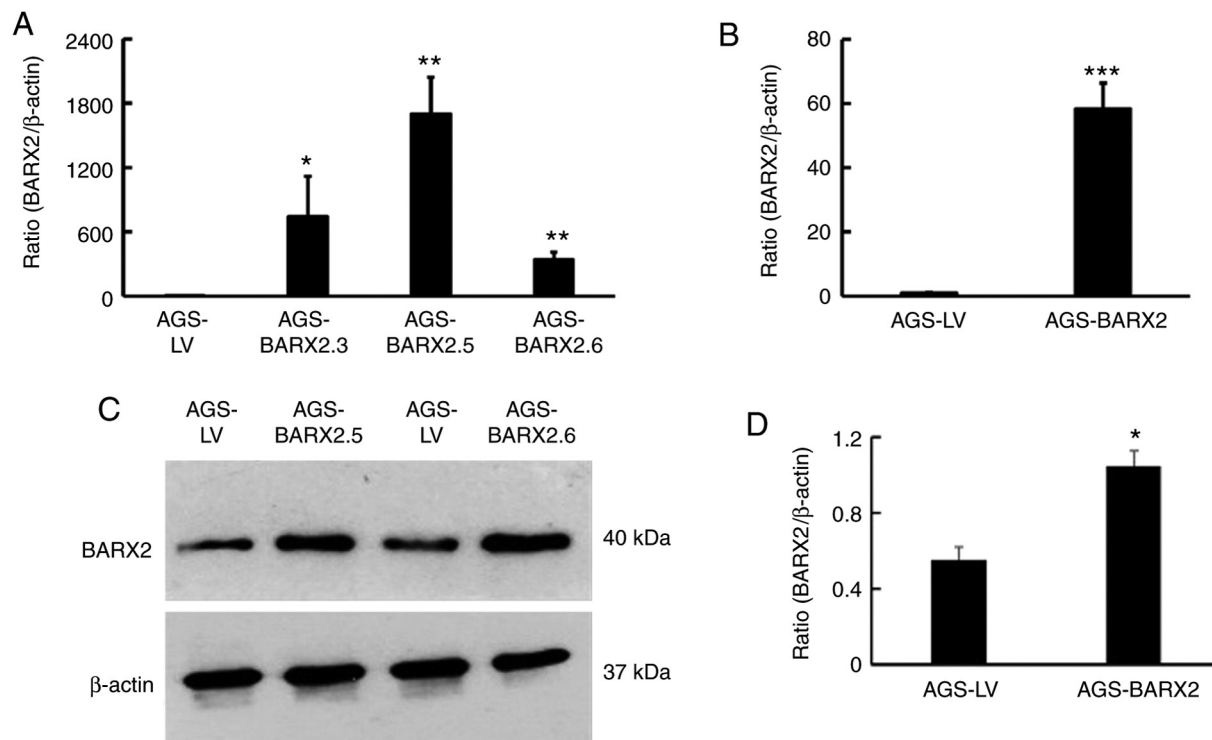

Supplement: Supplementary file 1 [file downloadSupplementary]
